# Supplementary material
Source: PubMed Central journal article supplement (PMC5330212)

## Supplemental Data:

### IMAC-2 Investigators

*University of Pittsburgh Medical Center (80)* Dennis M McNamara, MD, Karen Janosko MSN,MBA, Charles McTiernan, Barry London, MD-PhD PhD, Karen Hanley-Yanez BS, John Gorcsan MD, Hidekazu Tanaka MD, Mathew Suffoletto, MD. *Cleveland Clinic (51)* Randall C Starling, MD; Cynthia Oblak, CCRN. *Mayo Clinic (41)* Leslie T. Cooper, MD, Annette McNallan, RN, LuAnne Koenig, RN. *Jefferson Heart Institute at Jefferson Medical College (34)* Paul Mather, MD, Natalie Pierson, BSN, Sharon Rubin, MD, Yanique Bell, RN and Alicia Ervin, RN. *Penn State Hershey Medical Center (26)* John Boehmer, MD; Patricia Frey, RN, BSN. *University of Rochester (21)* Jeffrey Alexis MD, Janice Schrack, RN, Pam LaDuke. *Methodist Hospital, Houston (20)* Guillermo Torre-Amione, MD-PhD, Jeannie Arredondo. *University of Florida College of Medicine (20)* Daniel F. Pauly, MD-PhD, Pamela C. Smith, LPN. *McGill SMBD Jewish General (18)* Richard Sheppard, MD; Stephanie Fuoco, RN, BSN. *Johns Hopkins Hospital (15)* Ilan S. Wittstein, MD; Elayne Breton, RN. *Wake Forest University Baptist Medical Center (12)* Vinay Thohan, MD; Deborah Wesley, RN, BSN. *Massachusetts General Hospital (11)* G. William Dec, MD; Diane Cocca-Spofford, RN, BSN, MHA. *University of Texas Southwestern Medical Center (11)* David W. Markham. MD-MSc, Lynn Fernandez, RN, Colleen Debes, RN. *Newark Beth Israel Medical Center (6)* Mark J. Zucker MD; Laura Adams, RN. *University of Toronto (4)* Peter Liu MD, Judith Renton, RN. *University of California at Irvine (3)* Jagat Narula, MD-PhD, Byron Allen, MD, Elizabeth Westberg, RN

**Supplemental Figure 1.**

LVEF in each study subject in the 3 groups of  $\beta_1$ AR-AAb negative (A), non-IgG3- $\beta_1$ AR-AAb positive (B) and IgG3- $\beta_1$ AR-AAb positive (C) groups.

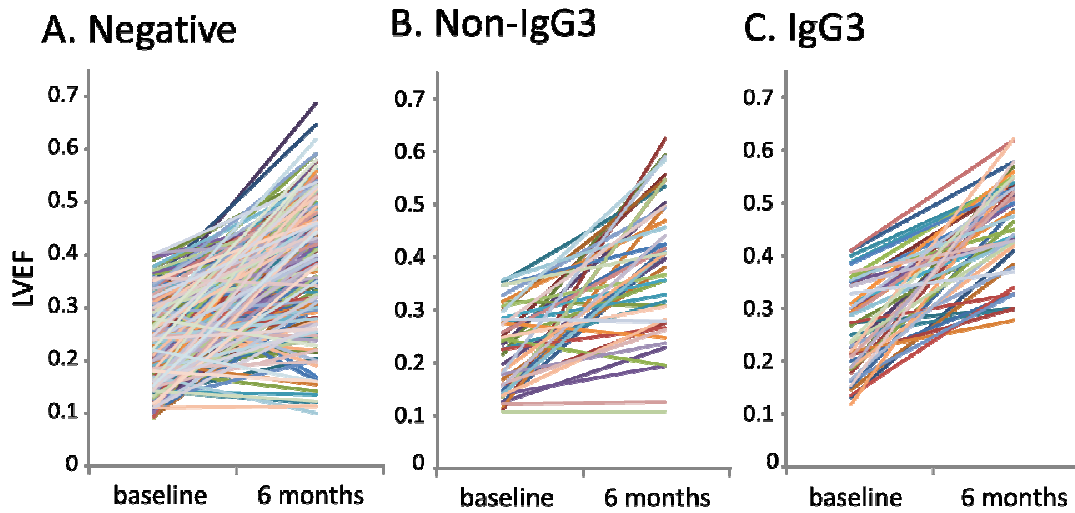

Supplement: NIHMS848615-supplement-supplement_1.pdf [file NIHMS848615-supplement-supplement_1.pdf]
